# Supplementary material for: Regional analgesia techniques for lumbar spine surgery: a frequentist network meta-analysis
Source: PubMed Central journal article supplement — Int J Surg. 2023 Mar 13;109(6):1728–41. doi: 10.1097/JS9.0000000000000270 (PMC10389589; doi:10.1097/js9.0000000000000270), 2023-03-13

# Late postoperative period pain score

Boohwi Hong

## Package install

## Data Preparation

## Model Fitting

## Results of Model

```
##      Length      Class      Mode
##           35 character character

## Original data (with adjusted standard errors for multi-arm studies):
##
##           treat1 treat2      TE  seTE seTE.adj narms multiarm
## Asar,2022      Control  ESPB  1.0000 0.3247  0.5802    2
## Zhu,2021       Control  ESPB  1.3000 0.1789  0.5130    2
## Zhang Q,2021   Control  ESPB  0.1000 0.2887  0.5608    2
## Zhang J,2021   Control  ESPB  0.7000 0.3277  0.5818    2
## Yu,2021        Control  ESPB -0.7000 0.2688  0.5508    2
## Yesiltas,2021 Control  ESPB  0.5000 0.3076  0.5708    2
## Wang,2021      Control  ESPB  0.6000 0.1078  0.6043    3      *
## Wang,2021      ESPB     TLIP  0.1000 0.1129  0.6071    3      *
## Wang,2021      Control  TLIP  0.7000 0.0918  0.5964    3      *
## Wahdan,2021    Control  ESPB  0.3000 0.2032  0.5220    2
## Jin,2021       Control  ESPB  0.0000 0.0254  0.4815    2
## Goel,2021      Control  ESPB  0.4000 0.1296  0.4980    2
## Eltaher,2021   Control  TLIP  0.9000 0.2041  0.5223    2
## Zhang TJ,2020  Control  ESPB  0.6000 0.3396  0.5886    2
## Singh, 2020    Control  ESPB  0.0000 0.5060  0.6980    2
## Kraiwattanapong,2020 Control  WI  2.2000 0.5220  0.7097    2
## Eskin,2020     Control  ESPB  0.7000 0.1275  0.4974    2
## Ekin,2020      TLIP     WI  -0.3000 0.1683  0.5094    2
## Ciftci,2020    Control  ESPB  0.0000 0.2066  0.6409    3      *
## Ciftci,2020    ESPB     TLIP -0.0000 0.2066  0.6409    3      *
## Ciftci,2020    Control  TLIP  0.0000 0.2066  0.6409    3      *
## Yayik,2020     Control  ESPB  0.8000 0.3746  0.6095    2
## Ozmen,2019     Control  TLIP  0.6000 0.0354  0.4821    2
## Mohta,2019     Control  WI  1.8000 0.1601  0.5067    2
## Ghamry,2019    Control  ESPB  0.1000 0.1169  0.4948    2
## Chen, 2019     Control  TLIP  2.5000 0.2066  0.5233    2
## Ammar,2018     Control  TLIP  0.5000 0.1352  0.4994    2
```

```

## Ozyilmaz,2012      Control    WI  0.2000  0.0632  0.4849  2
## Esmail,2008        Control    WI -0.4000  0.3494  0.5943  2
## Yorukoglu,2005    Control    WI  0.0000  0.4785  0.6784  2
## Milligan,1993     Control    WI  0.4000  0.5565  0.7354  2
## Yorukoglu,2021    Control    ESPB 0.4000  0.3981  0.6242  2
## Finnerty,2021     Control    ESPB 0.0000  0.5477  0.7288  2
## Ahiskalioglu,2018 Control    TLIP 2.0000  0.4743  0.6754  2
##
## Number of treatment arms (by study):
##          narms
## Asar,2022          2
## Zhu,2021           2
## Zhang Q,2021       2
## Zhang J,2021       2
## Yu,2021            2
## Yesiltas,2021     2
## Wang,2021          3
## Wahdan,2021        2
## Jin,2021           2
## Goel,2021          2
## Eltaher,2021       2
## Zhang TJ,2020      2
## Singh, 2020         2
## Kraiwattanapong,2020 2
## Eskin,2020         2
## Ekinici,2020       2
## Ciftci,2020        3
## Yayik,2020         2
## Ozmen,2019         2
## Mohta,2019         2
## Ghamry,2019        2
## Chen, 2019         2
## Ammar,2018         2
## Ozyilmaz,2012      2
## Esmail,2008         2
## Yorukoglu,2005     2
## Milligan,1993      2
## Yorukoglu,2021     2
## Finnerty,2021      2
## Ahiskalioglu,2018  2
##
## Results (random effects model):
##
##          treat1 treat2      MD      95%-CI
## Asar,2022      Control  ESPB  0.4290 [ 0.1780; 0.6800]
## Zhu,2021       Control  ESPB  0.4290 [ 0.1780; 0.6800]
## Zhang Q,2021   Control  ESPB  0.4290 [ 0.1780; 0.6800]
## Zhang J,2021   Control  ESPB  0.4290 [ 0.1780; 0.6800]
## Yu,2021        Control  ESPB  0.4290 [ 0.1780; 0.6800]
## Yesiltas,2021 Control  ESPB  0.4290 [ 0.1780; 0.6800]
## Wang,2021      Control  ESPB  0.4290 [ 0.1780; 0.6800]
## Wang,2021      ESPB     TLIP  0.4952 [ 0.0871; 0.9033]
## Wang,2021      Control  TLIP  0.9242 [ 0.5717; 1.2766]
## Wahdan,2021    Control  ESPB  0.4290 [ 0.1780; 0.6800]

```

```

## Jin,2021           Control  ESPB  0.4290 [ 0.1780; 0.6800]
## Goel,2021          Control  ESPB  0.4290 [ 0.1780; 0.6800]
## Eltahir,2021       Control  TLIP  0.9242 [ 0.5717; 1.2766]
## Zhang TJ,2020      Control  ESPB  0.4290 [ 0.1780; 0.6800]
## Singh, 2020         Control  ESPB  0.4290 [ 0.1780; 0.6800]
## Kraiwattanapong,2020 Control  WI   0.6834 [ 0.2491; 1.1176]
## Eskin,2020          Control  ESPB  0.4290 [ 0.1780; 0.6800]
## Ekin,2020           TLIP    WI  -0.2408 [-0.7574; 0.2758]
## Ciftci,2020         Control  ESPB  0.4290 [ 0.1780; 0.6800]
## Ciftci,2020         ESPB    TLIP  0.4952 [ 0.0871; 0.9033]
## Ciftci,2020         Control  TLIP  0.9242 [ 0.5717; 1.2766]
## Yayik,2020          Control  ESPB  0.4290 [ 0.1780; 0.6800]
## Ozmen,2019          Control  TLIP  0.9242 [ 0.5717; 1.2766]
## Mohta,2019          Control  WI   0.6834 [ 0.2491; 1.1176]
## Ghamry,2019         Control  ESPB  0.4290 [ 0.1780; 0.6800]
## Chen, 2019           Control  TLIP  0.9242 [ 0.5717; 1.2766]
## Ammar,2018          Control  TLIP  0.9242 [ 0.5717; 1.2766]
## Ozyilmaz,2012       Control  WI   0.6834 [ 0.2491; 1.1176]
## Esmail,2008          Control  WI   0.6834 [ 0.2491; 1.1176]
## Yorukoglu,2005      Control  WI   0.6834 [ 0.2491; 1.1176]
## Milligan,1993       Control  WI   0.6834 [ 0.2491; 1.1176]
## Yorukoglu,2021      Control  ESPB  0.4290 [ 0.1780; 0.6800]
## Finnerty,2021       Control  ESPB  0.4290 [ 0.1780; 0.6800]
## Ahiskalioglu,2018   Control  TLIP  0.9242 [ 0.5717; 1.2766]
##
## Number of studies: k = 30
## Number of pairwise comparisons: m = 34
## Number of treatments: n = 4
## Number of designs: d = 5
##
## Random effects model
##
## Treatment estimate (sm = 'MD', comparison: other treatments vs 'Control'):
##           MD           95%-CI      z  p-value
## Control      .             .             .      .
## ESPB    -0.4290 [-0.6800; -0.1780] -3.35  0.0008
## TLIP    -0.9242 [-1.2766; -0.5717] -5.14 < 0.0001
## WI      -0.6834 [-1.1176; -0.2491] -3.08  0.0020
##
## Quantifying heterogeneity / inconsistency:
## tau^2 = 0.2312; tau = 0.4808; I^2 = 91.7% [89.2%; 93.6%]
##
## Tests of heterogeneity (within designs) and inconsistency (between designs):
##           Q d.f.  p-value
## Total           348.23  29 < 0.0001
## Within designs  324.44  26 < 0.0001
## Between designs  23.78   3 < 0.0001

## Number of studies: k = 30
## Number of pairwise comparisons: m = 34
## Number of treatments: n = 4
## Number of designs: d = 5
##
## Random effects model

```

```

##
## Treatment estimate (sm = 'MD', comparison: other treatments vs 'Control'):
##           MD           95%-CI      z  p-value
## Control           .           .      .      .
## ESPB    -0.4290 [-0.6800; -0.1780] -3.35  0.0008
## TLIP    -0.9242 [-1.2766; -0.5717] -5.14 < 0.0001
## WI      -0.6834 [-1.1176; -0.2491] -3.08  0.0020
##
## Quantifying heterogeneity / inconsistency:
## tau^2 = 0.2312; tau = 0.4808; I^2 = 91.7% [89.2%; 93.6%]
##
## Tests of heterogeneity (within designs) and inconsistency (between designs):
##           Q d.f.  p-value
## Total           348.23   29 < 0.0001
## Within designs  324.44   26 < 0.0001
## Between designs  23.78    3 < 0.0001

## Q statistics to assess homogeneity / consistency
##
##           Q df  p-value
## Total           348.23  29 < 0.0001
## Within designs  324.44  26 < 0.0001
## Between designs  23.78   3 < 0.0001
##
## Design-specific decomposition of within-designs Q statistic
##
##           Design      Q df  p-value
## Control vs ESPB  116.00  15 < 0.0001
## Control vs TLIP   92.99   4 < 0.0001
## Control vs WI    104.29   5 < 0.0001
## Control vs ESPB vs TLIP  11.17  2  0.0038
##
## Between-designs Q statistic after detaching of single designs
##
##           Detached design      Q df  p-value
## Control vs ESPB    0.73  2  0.6955
## Control vs TLIP   19.35  2 < 0.0001
## Control vs WI    23.57  2 < 0.0001
## TLIP vs WI      23.57  2 < 0.0001
## Control vs ESPB vs TLIP  0.08  1  0.7752
##
## Q statistic to assess consistency under the assumption of
## a full design-by-treatment interaction random effects model
##
##           Q df  p-value tau.within tau2.within
## Between designs 3.34  3  0.3418    0.5540    0.3069

```

# Network Graph

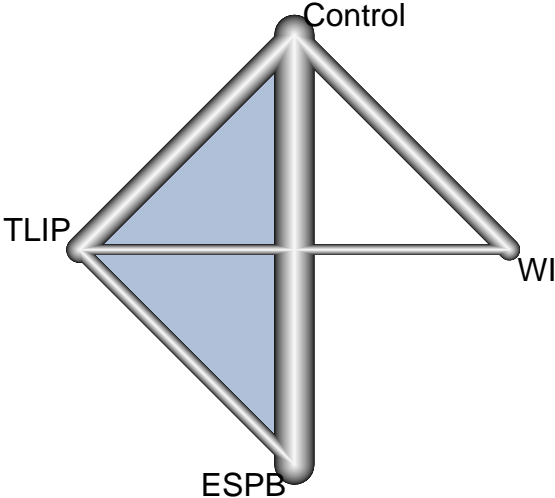

# Visualizing Direct and Indirect Evidence

## Extensive documentation for the dmetar package can be found at:  
 ## [www.bookdown.org/MathiasHarrer/Doing\\_Meta\\_Analysis\\_in\\_R/](http://www.bookdown.org/MathiasHarrer/Doing_Meta_Analysis_in_R/)

## Direct Evidence Proportion for each Network Estimate

```
## -----
##           Direct Indirect meanpath  minpar
## Control vs ESPB 0.9909  0.0091 1.025640 1.067828
## Control vs TLIP 0.9489  0.0511 1.078426 1.219039
## Control vs WI   0.9003  0.0997 1.104833 1.110770
## ESPB vs TLIP   0.1375  0.8625 1.914532 1.127762
## TLIP vs WI     0.1284  0.8716 1.916278 1.147290
## ESPB vs WI     0.0000  1.0000 2.060253 1.073686
```

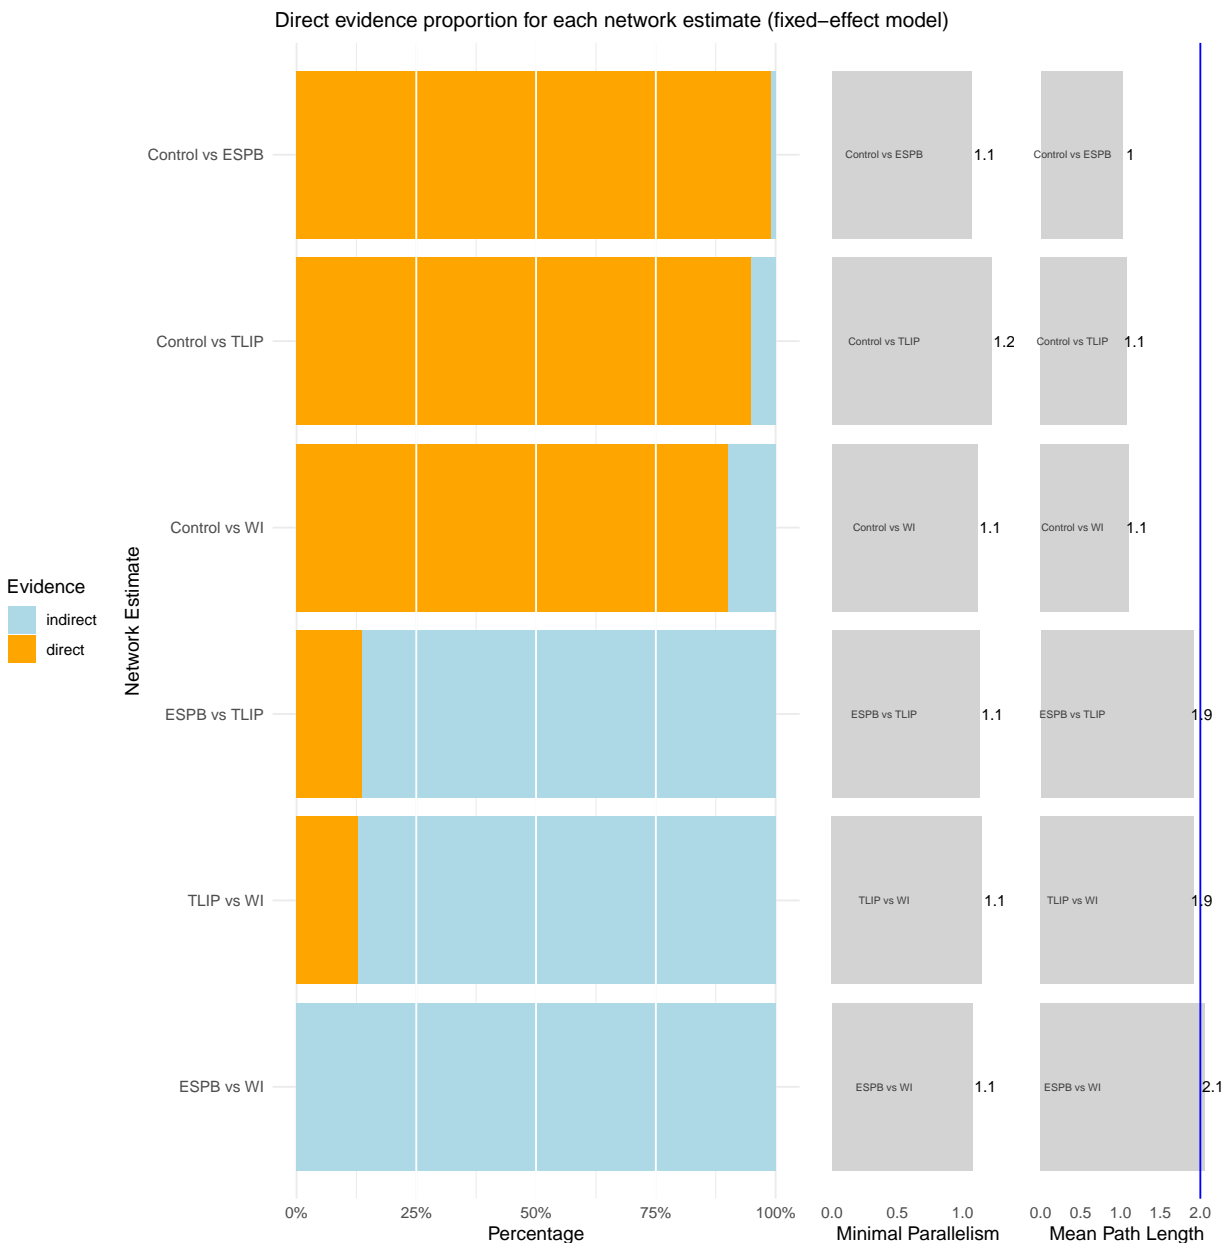

## Effect Estimate Table

```
##           Control  ESPB  TLIP    WI
## Control          NA  0.429  0.924  0.683
## ESPB             NA    NA  0.495  0.254
## TLIP             NA    NA    NA -0.241
## WI               NA    NA    NA    NA
```

```
## League table (random effects model):
```

```
##
##           Control 0.39 ( 0.13;  0.64)  0.95 ( 0.56;  1.34)
## 0.43 ( 0.18;  0.68)                    ESPB 0.05 (-0.65;  0.76)
## 0.92 ( 0.57;  1.28) 0.50 ( 0.09;  0.90)                    TLIP
## 0.68 ( 0.25;  1.12) 0.25 (-0.24;  0.75) -0.24 (-0.76;  0.28)
##
## 0.70 ( 0.22;  1.17)
## .
## -0.30 (-1.30;  0.70)
##           WI
```

## Ranking and Forest plot

```
##          P-score
## TLIP      0.9369
## WI        0.6737
## ESPB      0.3889
## Control   0.0005
```

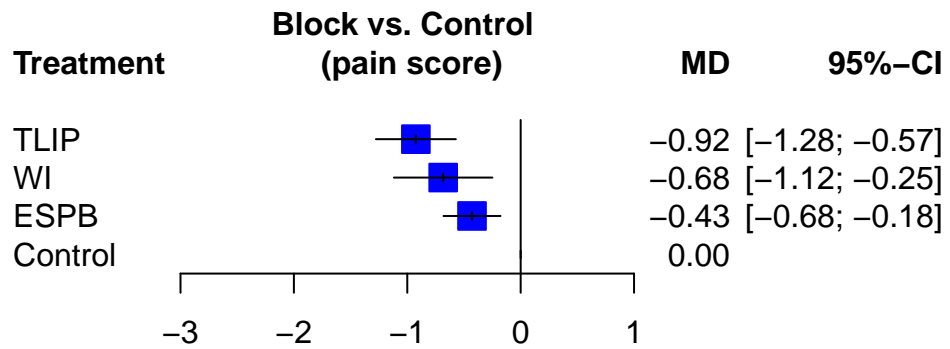



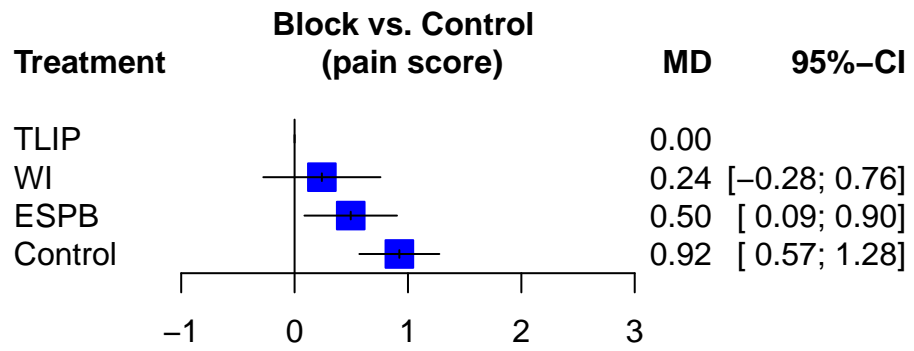

## Rankogram by 100,000 simulation

This rankogram function calculates the probabilities of each treatment being at each possible rank and the SUCRAs (Surface Under the Cumulative RANking curve) in frequentist network meta-analysis.

```
## Rankogram (based on 1e+05 simulations)
##
## Common effects model:
##
##           1      2      3      4
## Control 0.0000 0.0000 0.3736 0.6264
## ESPB    0.0000 1.0000 0.0000 0.0000
## TLIP    1.0000 0.0000 0.0000 0.0000
## WI      0.0000 0.0000 0.6264 0.3736
##
## Random effects model:
##
##           1      2      3      4
## Control 0.0000 0.0000 0.0016 0.9984
## ESPB    0.0045 0.2688 0.7264 0.0004
## TLIP    0.9213 0.0752 0.0035 0.0000
## WI      0.0742 0.6560 0.2686 0.0012
```

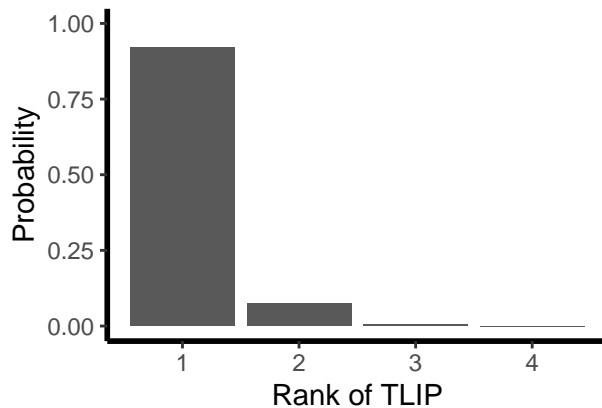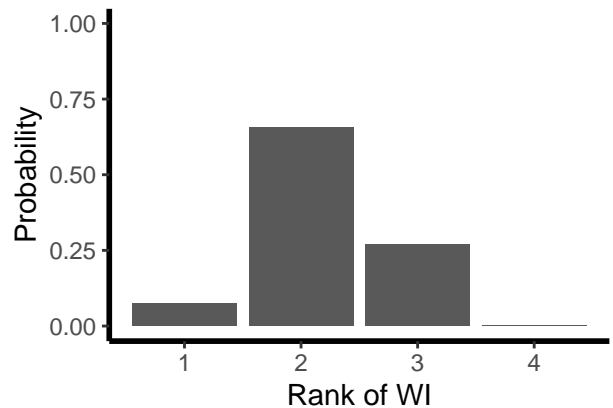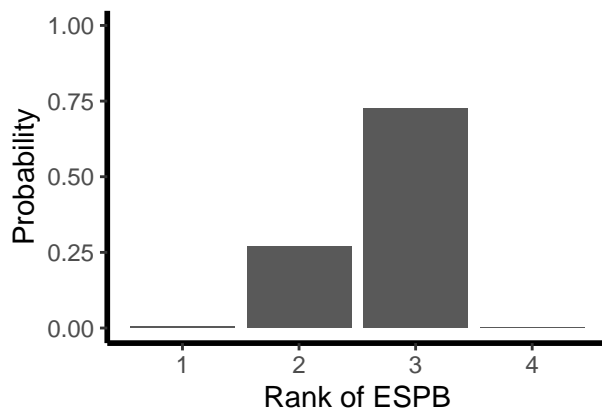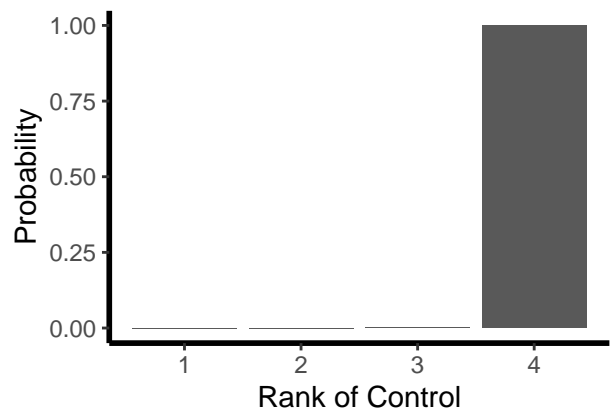

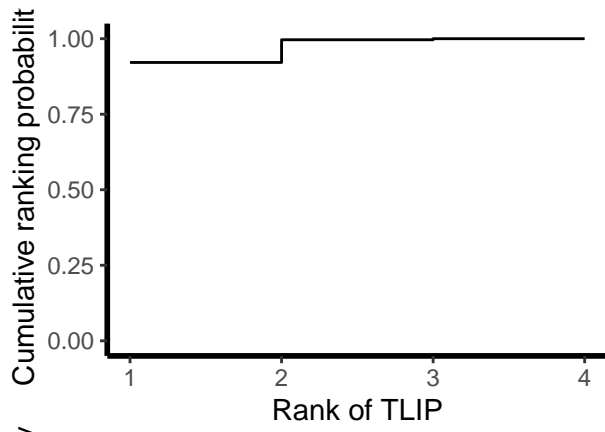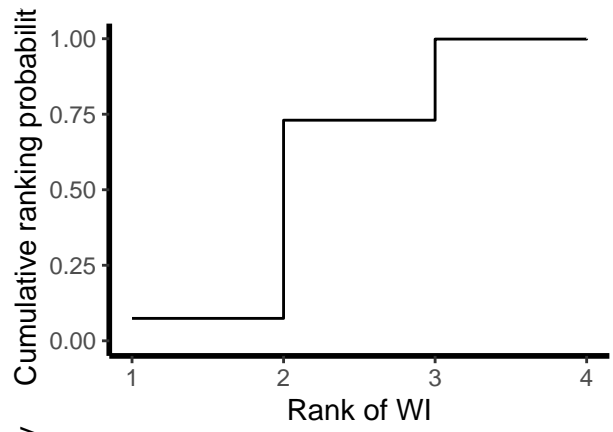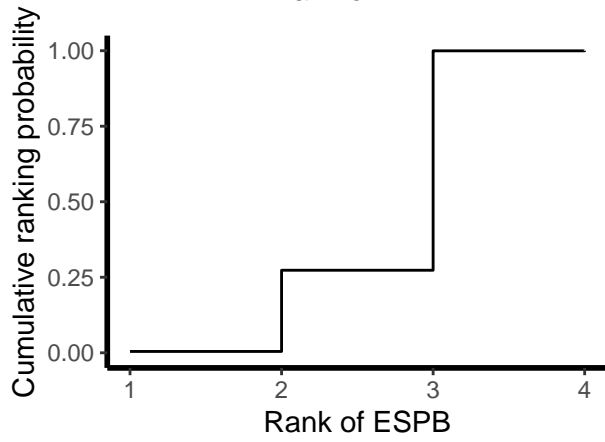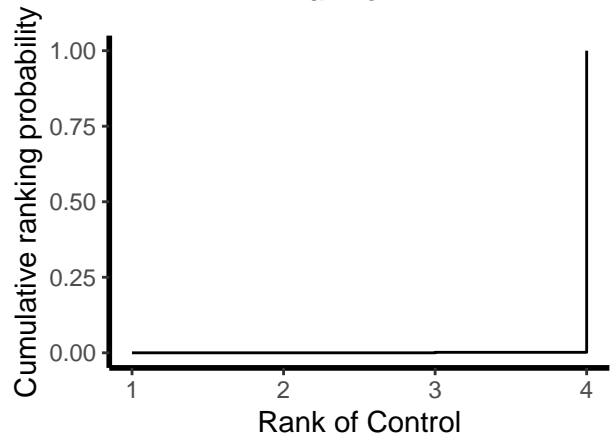

# Net Heat Plot for evaluating the validity of the results

The gray boxes signify how important a treatment comparison is for the estimation of another treatment comparison. The bigger the box, the more important the comparison.

The colored backgrounds signify the amount of inconsistency of the design in a row that can be attributed to the design in a column. Field colors can range from a deep red (which indicates strong inconsistency) to blue (which indicates that evidence from this design supports evidence in the row).

## Fixed effect model

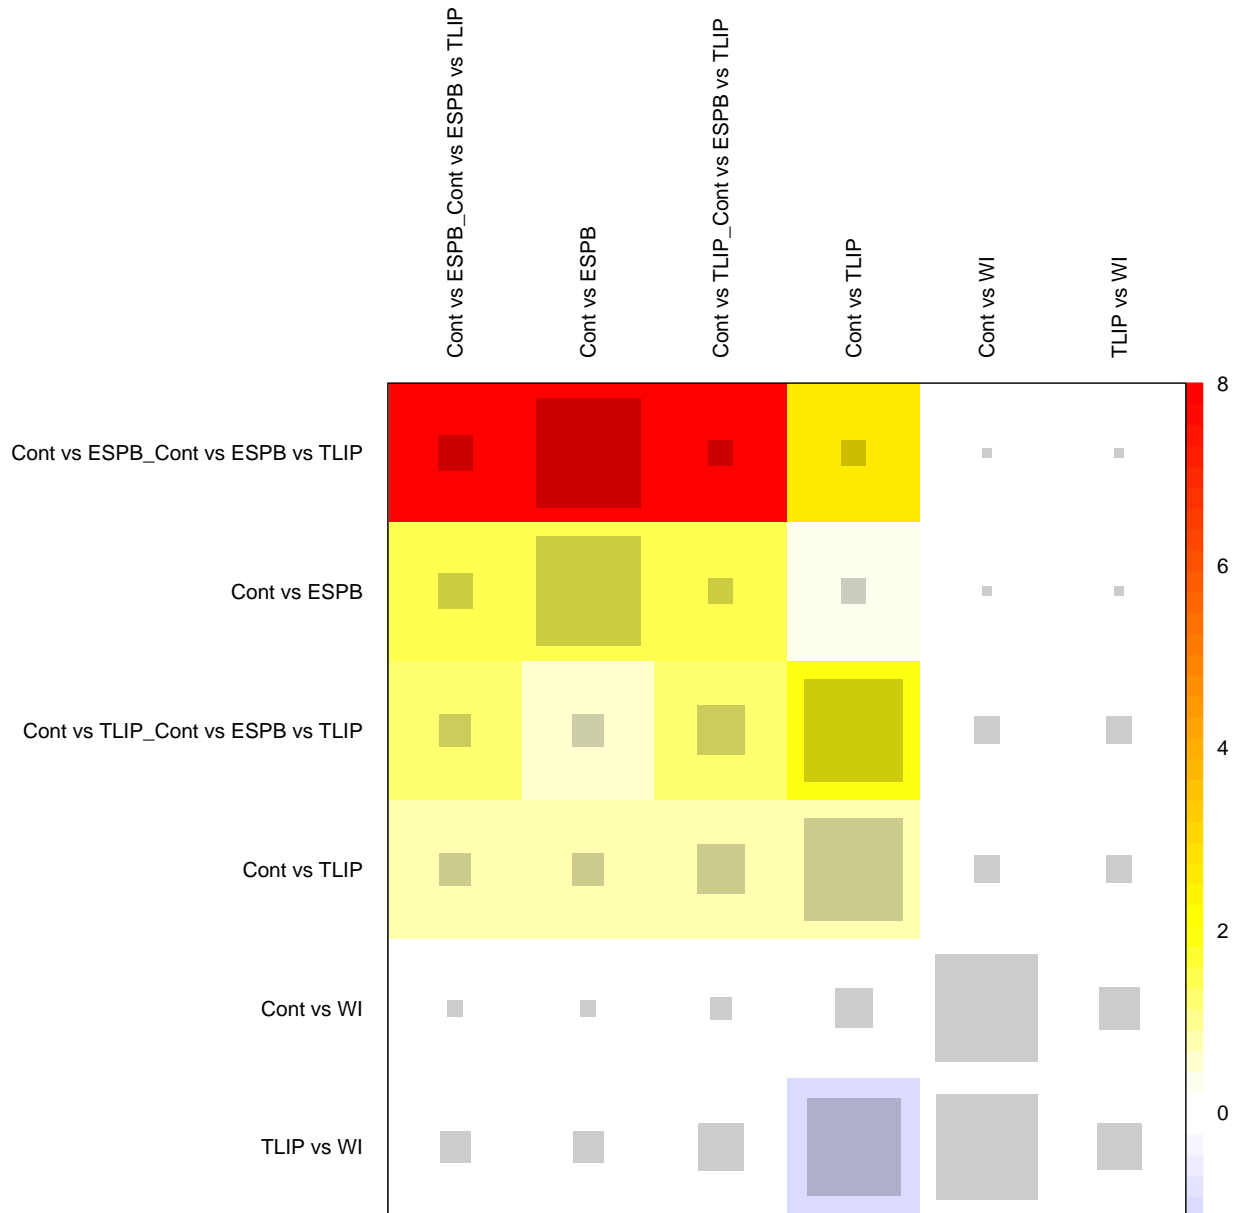

# Random effect model

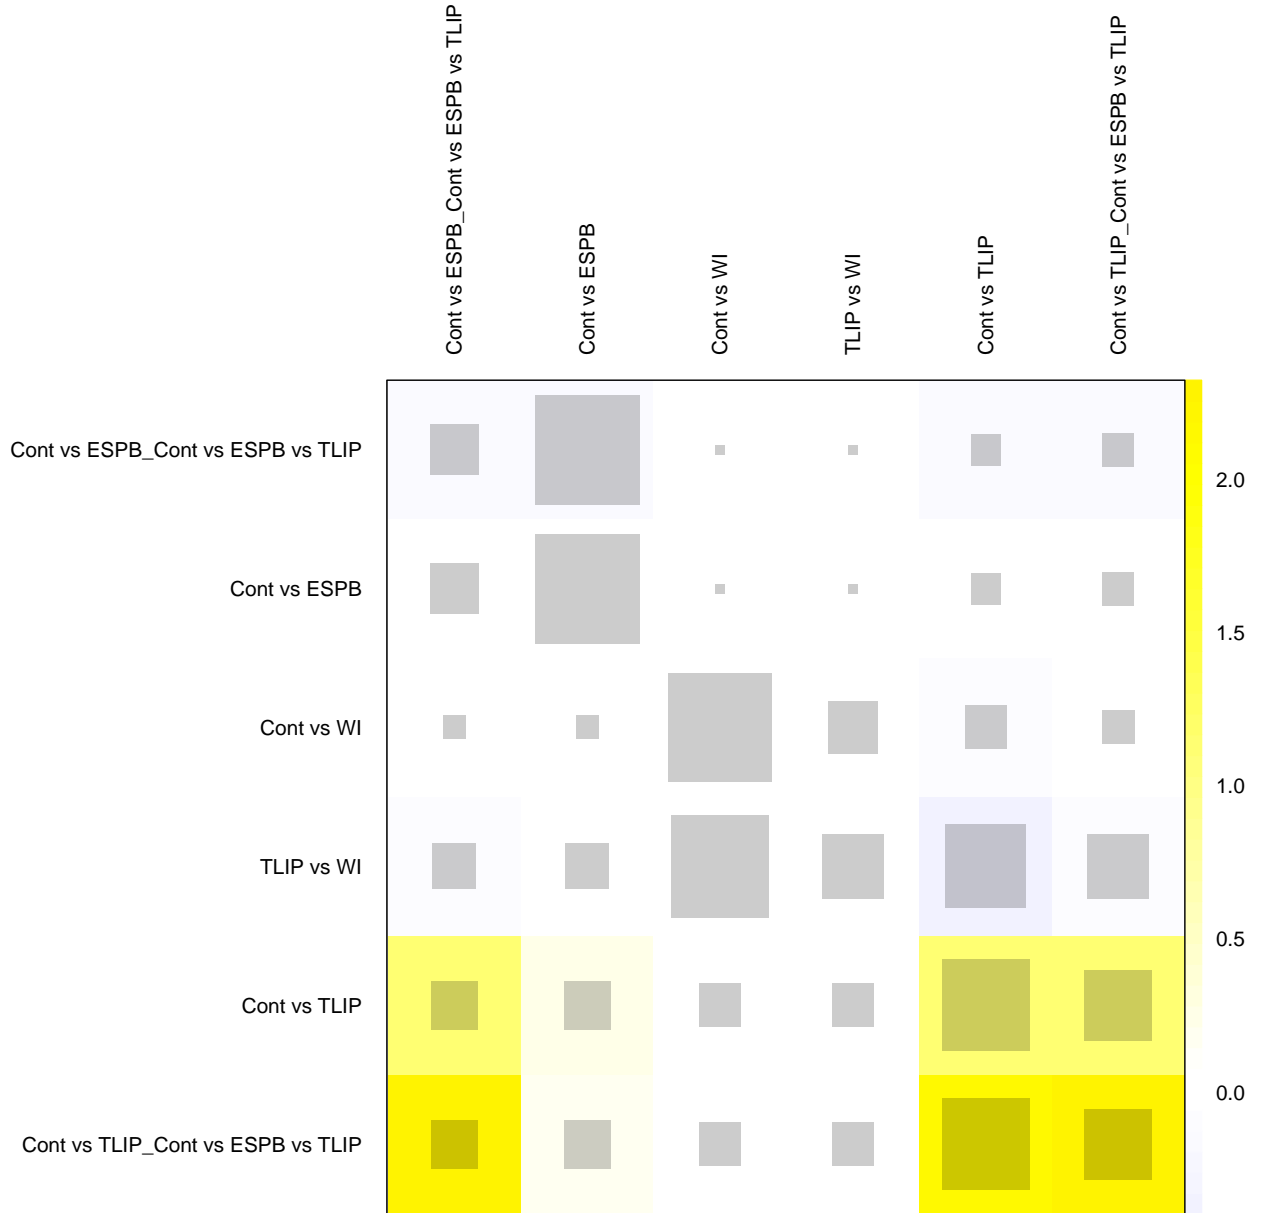

## Net Splitting to check for consistency

```
## Separate indirect from direct evidence (SIDE) using back-calculation method
##
## Random effects model:
##
##      comparison k prop      nma direct indir.   Diff      z p-value
## ESPB vs Control 18 0.97 -0.4290 -0.3857 -1.9330  1.5473  1.99  0.0464
## TLIP vs Control  7 0.83 -0.9242 -0.9483 -0.8069 -0.1414 -0.30  0.7673
##  WI vs Control  6 0.83 -0.6834 -0.6968 -0.6159 -0.0808 -0.14  0.8920
##   ESPB vs TLIP  2 0.34  0.4952  0.0529  0.7190 -0.6662 -1.51  0.1307
##     ESPB vs WI  0  0  0.2544      .  0.2544      .      .
##     TLIP vs WI  1 0.27 -0.2408 -0.3000 -0.2192 -0.0808 -0.14  0.8920
##
## Legend:
## comparison - Treatment comparison
## k          - Number of studies providing direct evidence
## prop       - Direct evidence proportion
## nma        - Estimated treatment effect (MD) in network meta-analysis
## direct     - Estimated treatment effect (MD) derived from direct evidence
## indir.     - Estimated treatment effect (MD) derived from indirect evidence
## Diff       - Difference between direct and indirect treatment estimates
## z          - z-value of test for disagreement (direct versus indirect)
## p-value    - p-value of test for disagreement (direct versus indirect)
```

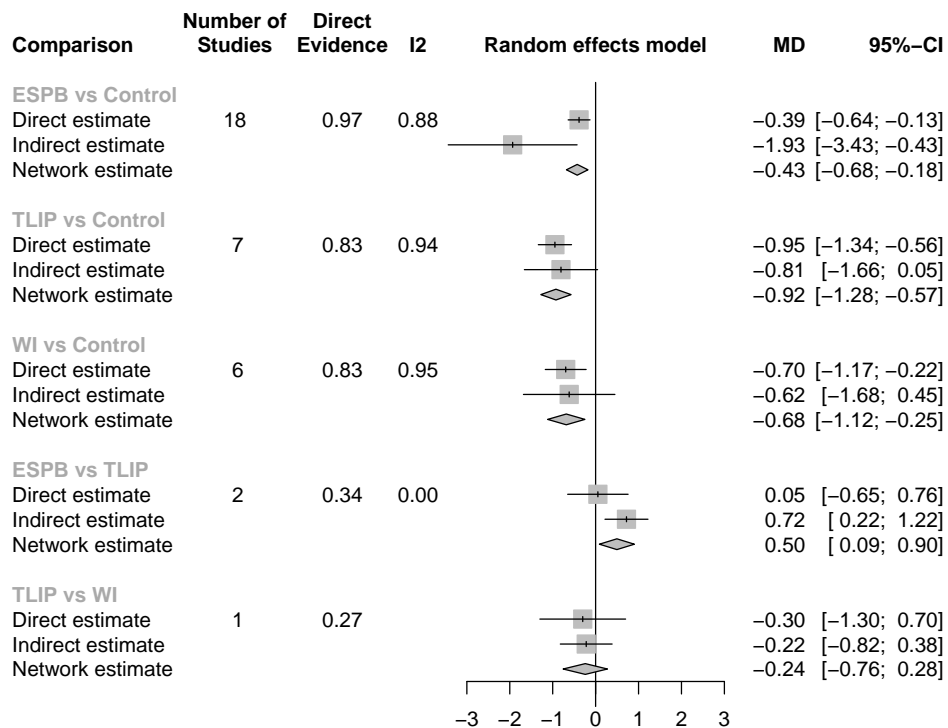

# Comparison-Adjusted Funnel Plots

## Warning: Use argument 'method.bias' instead of 'linreg' (deprecated).

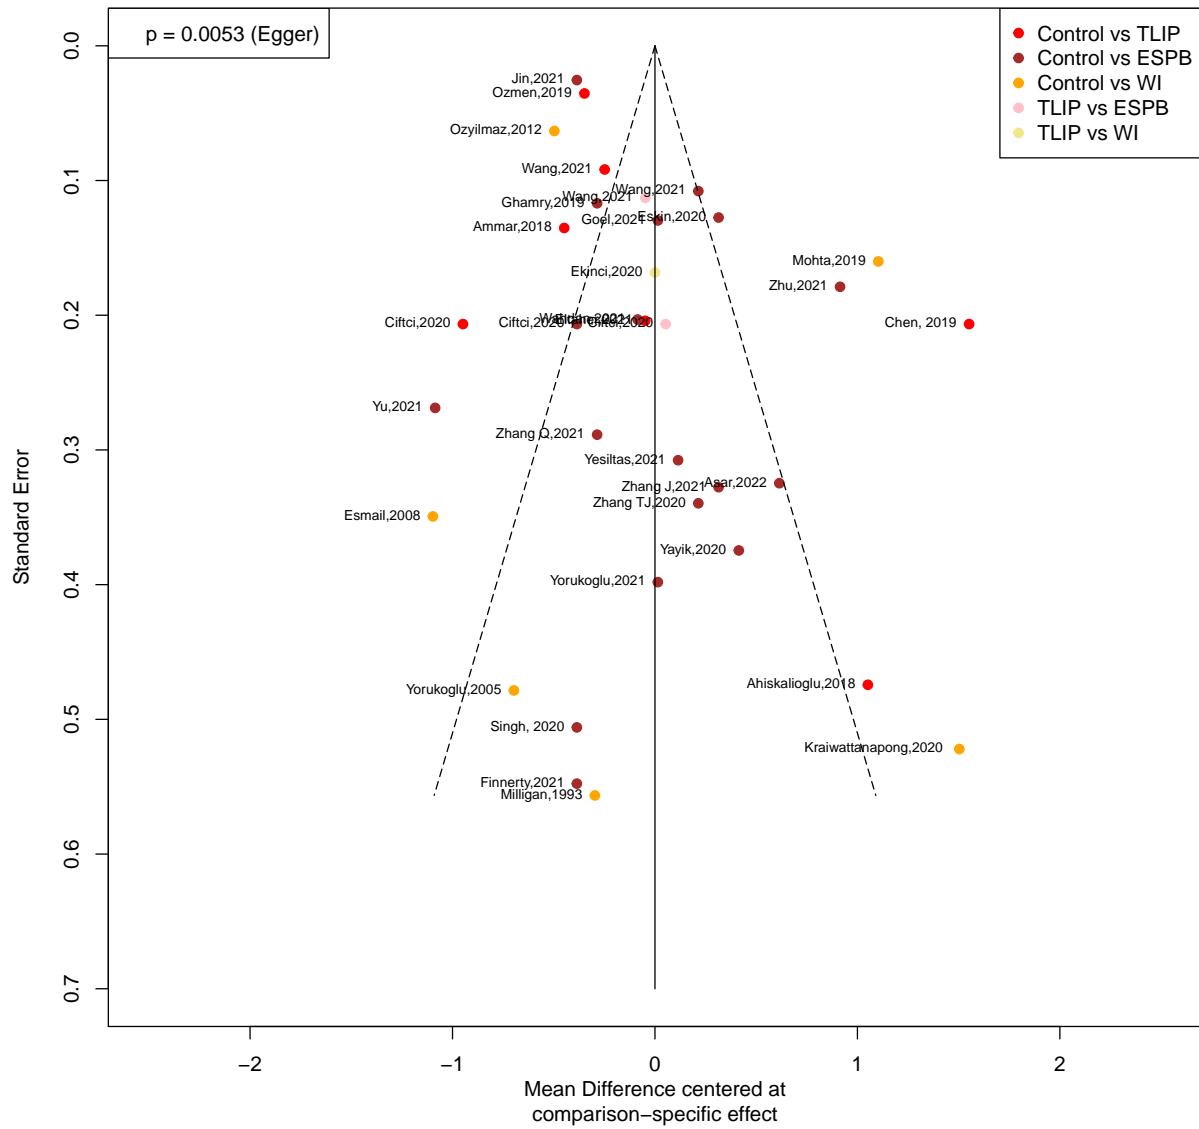

Supplement: js9-109-1728-s005.pdf [file js9-109-1728-s005.pdf]
